# Supplementary material for: Developing and validating a scale to measure Food and Nutrition Literacy (FNLIT) in elementary school children in Iran
Source: PubMed Central journal article supplement (PMC5487019; doi:10.1371/journal.pone.0179196), 2017-06-27

## Food and Nutrition Literacy (FNLIT) scale for elementary school children

Please carefully read each statement and check your response. Please check only one box for each statement.

|            | <b>Statements</b>                                                                                                                                                                                                                                                                                                    |
|------------|----------------------------------------------------------------------------------------------------------------------------------------------------------------------------------------------------------------------------------------------------------------------------------------------------------------------|
| <b>1.</b>  | <b>When shopping, how important is the nutritional information about food ingredients for you?</b><br><input type="checkbox"/> Not important at all <input type="checkbox"/> Not very important <input type="checkbox"/> Neutral <input type="checkbox"/> Somewhat important <input type="checkbox"/> Very important |
| <b>2.</b>  | <b>When shopping, how important is standardized labeling on food packages for you?</b><br><input type="checkbox"/> Not important at all <input type="checkbox"/> Not very important <input type="checkbox"/> Neutral <input type="checkbox"/> Somewhat important <input type="checkbox"/> Very important             |
| <b>3.</b>  | <b>When shopping, how important are production and expiration dates for you?</b><br><input type="checkbox"/> Not important at all <input type="checkbox"/> Not very important <input type="checkbox"/> Neutral <input type="checkbox"/> Somewhat important <input type="checkbox"/> Very important                   |
| <b>4.</b>  | <b>I can easily understand the nutrition facts (e.g., amount of energy, sugar, protein, etc.) on food packages.</b><br><input type="checkbox"/> Never <input type="checkbox"/> Seldom <input type="checkbox"/> Sometimes <input type="checkbox"/> Usually <input type="checkbox"/> Always                            |
| <b>5.</b>  | <b>I can easily understand nutritional issues I read about in newspapers, magazines, and brochures.</b><br><input type="checkbox"/> Never <input type="checkbox"/> Seldom <input type="checkbox"/> Sometimes <input type="checkbox"/> Usually <input type="checkbox"/> Always                                        |
| <b>6.</b>  | <b>I can understand nutritionists' recommendations about health and nutritional requirements that are appropriate for my age group.</b><br><input type="checkbox"/> Never <input type="checkbox"/> Seldom <input type="checkbox"/> Sometimes <input type="checkbox"/> Usually <input type="checkbox"/> Always        |
| <b>7.</b>  | <b>Boiling is one of the more healthy cooking methods.</b><br><input type="checkbox"/> Strongly agree <input type="checkbox"/> Agree <input type="checkbox"/> Neither agree nor disagree <input type="checkbox"/> Disagree <input type="checkbox"/> Strongly disagree                                                |
| <b>8.</b>  | <b>I can understand information and recommendations about proper nutrition for children in the media (e.g., TV, Internet, radio, etc.)</b><br><input type="checkbox"/> Never <input type="checkbox"/> Seldom <input type="checkbox"/> Sometimes <input type="checkbox"/> Usually <input type="checkbox"/> Always     |
| <b>9.</b>  | <b>Daily physical activity for 30–40 minutes prevents obesity.</b><br><input type="checkbox"/> Strongly agree <input type="checkbox"/> Agree <input type="checkbox"/> Neither agree nor disagree <input type="checkbox"/> Disagree <input type="checkbox"/> Strongly disagree                                        |
| <b>10.</b> | <b>I know how different vegetables are cultivated and grown.</b><br><input type="checkbox"/> Understand very well <input type="checkbox"/> Understand fairly well <input type="checkbox"/> Understand somewhat <input type="checkbox"/> Understand poorly <input type="checkbox"/> Don't understand at all           |
| <b>11.</b> | <b>Consumption of salty snacks (e.g., chips, corn puffs, etc.) is harmful for health.</b><br><input type="checkbox"/> Strongly agree <input type="checkbox"/> Agree <input type="checkbox"/> Neither agree nor disagree <input type="checkbox"/> Disagree <input type="checkbox"/> Strongly disagree                 |
| <b>12.</b> | <b>Excessive consumption of sugar, sweets, and chocolate is harmful for health.</b><br><input type="checkbox"/> Strongly agree <input type="checkbox"/> Agree <input type="checkbox"/> Neither agree nor disagree <input type="checkbox"/> Disagree <input type="checkbox"/> Strongly disagree                       |
| <b>13.</b> | <b>Consumption of salami and sausage that are high in fat may cause obesity.</b><br><input type="checkbox"/> Strongly agree <input type="checkbox"/> Agree <input type="checkbox"/> Neither agree nor disagree <input type="checkbox"/> Disagree <input type="checkbox"/> Strongly disagree                          |
| <b>14.</b> | <b>Consumption of salami and sausage may cause cancer.</b>                                                                                                                                                                                                                                                           |

|     |                                                                                                                                                                                           |                                 |                                                     |                                   |                                            |
|-----|-------------------------------------------------------------------------------------------------------------------------------------------------------------------------------------------|---------------------------------|-----------------------------------------------------|-----------------------------------|--------------------------------------------|
|     | <input type="checkbox"/> Strongly agree                                                                                                                                                   | <input type="checkbox"/> Agree  | <input type="checkbox"/> Neither agree nor disagree | <input type="checkbox"/> Disagree | <input type="checkbox"/> Strongly disagree |
| 15. | <b>Reading of production and expiration dated on food packaged is important for health.</b>                                                                                               |                                 |                                                     |                                   |                                            |
|     | <input type="checkbox"/> Strongly agree                                                                                                                                                   | <input type="checkbox"/> Agree  | <input type="checkbox"/> Neither agree nor disagree | <input type="checkbox"/> Disagree | <input type="checkbox"/> Strongly disagree |
| 16. | <b>I eat a variety of vegetables (e.g., lettuce, cabbage, tomatoes, carrots, etc.), every day.</b>                                                                                        |                                 |                                                     |                                   |                                            |
|     | <input type="checkbox"/> Never                                                                                                                                                            | <input type="checkbox"/> Seldom | <input type="checkbox"/> Sometimes                  | <input type="checkbox"/> Usually  | <input type="checkbox"/> Always            |
| 17. | <b>I share the nutritional issues that I obtain from various sources with others (e.g., friends, family, etc.)</b>                                                                        |                                 |                                                     |                                   |                                            |
|     | <input type="checkbox"/> Never                                                                                                                                                            | <input type="checkbox"/> Seldom | <input type="checkbox"/> Sometimes                  | <input type="checkbox"/> Usually  | <input type="checkbox"/> Always            |
| 18. | <b>I talk to my friends and family about healthy eating.</b>                                                                                                                              |                                 |                                                     |                                   |                                            |
|     | <input type="checkbox"/> Never                                                                                                                                                            | <input type="checkbox"/> Seldom | <input type="checkbox"/> Sometimes                  | <input type="checkbox"/> Usually  | <input type="checkbox"/> Always            |
| 19. | <b>If I have any questions about food and nutrition issues, I'm able to get information and advice from parents, teachers, etc.</b>                                                       |                                 |                                                     |                                   |                                            |
|     | <input type="checkbox"/> Never                                                                                                                                                            | <input type="checkbox"/> Seldom | <input type="checkbox"/> Sometimes                  | <input type="checkbox"/> Usually  | <input type="checkbox"/> Always            |
| 20. | <b>I prepare my own snacks for school.</b>                                                                                                                                                |                                 |                                                     |                                   |                                            |
|     | <input type="checkbox"/> Never                                                                                                                                                            | <input type="checkbox"/> Seldom | <input type="checkbox"/> Sometimes                  | <input type="checkbox"/> Usually  | <input type="checkbox"/> Always            |
| 21. | <b>I bring healthy snacks to school.</b>                                                                                                                                                  |                                 |                                                     |                                   |                                            |
|     | <input type="checkbox"/> Never                                                                                                                                                            | <input type="checkbox"/> Seldom | <input type="checkbox"/> Sometimes                  | <input type="checkbox"/> Usually  | <input type="checkbox"/> Always            |
| 22. | <b>I regularly do exercise or walk for 30 to 40 minutes every day.</b>                                                                                                                    |                                 |                                                     |                                   |                                            |
|     | <input type="checkbox"/> Never                                                                                                                                                            | <input type="checkbox"/> Seldom | <input type="checkbox"/> Sometimes                  | <input type="checkbox"/> Usually  | <input type="checkbox"/> Always            |
| 23. | <b>I wash and prepare fruits and vegetables myself.</b>                                                                                                                                   |                                 |                                                     |                                   |                                            |
|     | <input type="checkbox"/> Never                                                                                                                                                            | <input type="checkbox"/> Seldom | <input type="checkbox"/> Sometimes                  | <input type="checkbox"/> Usually  | <input type="checkbox"/> Always            |
| 24. | <b>I eat fruit every day.</b>                                                                                                                                                             |                                 |                                                     |                                   |                                            |
|     | <input type="checkbox"/> Never                                                                                                                                                            | <input type="checkbox"/> Seldom | <input type="checkbox"/> Sometimes                  | <input type="checkbox"/> Usually  | <input type="checkbox"/> Always            |
| 25. | <b>I eat breakfast every day.</b>                                                                                                                                                         |                                 |                                                     |                                   |                                            |
|     | <input type="checkbox"/> Never                                                                                                                                                            | <input type="checkbox"/> Seldom | <input type="checkbox"/> Sometimes                  | <input type="checkbox"/> Usually  | <input type="checkbox"/> Always            |
| 26. | <b>I have enough will power to resist unhealthy foods (e.g., fast food, pizza, carbonated drinks, etc.)</b>                                                                               |                                 |                                                     |                                   |                                            |
|     | <input type="checkbox"/> Never                                                                                                                                                            | <input type="checkbox"/> Seldom | <input type="checkbox"/> Sometimes                  | <input type="checkbox"/> Usually  | <input type="checkbox"/> Always            |
| 27. | <b>If I go to restaurant or fast food with my friends, and all of them choose unhealthy foods (e.g., pizza, French fries, carbonated drinks, etc.), I'm able to choose healthy foods.</b> |                                 |                                                     |                                   |                                            |
|     | <input type="checkbox"/> Never                                                                                                                                                            | <input type="checkbox"/> Seldom | <input type="checkbox"/> Sometimes                  | <input type="checkbox"/> Usually  | <input type="checkbox"/> Always            |
| 28. | <b>I can easily say "No" to any unhealthy eating suggestions from my friends.</b>                                                                                                         |                                 |                                                     |                                   |                                            |
|     | <input type="checkbox"/> Never                                                                                                                                                            | <input type="checkbox"/> Seldom | <input type="checkbox"/> Sometimes                  | <input type="checkbox"/> Usually  | <input type="checkbox"/> Always            |
| 29. | <b>If I encounter unhealthy behaviors at home, school, or in other settings, I'm able to challenge them.</b>                                                                              |                                 |                                                     |                                   |                                            |

|            |                                                                                                                                                                      |                                         |                                    |                                        |                                          |
|------------|----------------------------------------------------------------------------------------------------------------------------------------------------------------------|-----------------------------------------|------------------------------------|----------------------------------------|------------------------------------------|
|            | <input type="checkbox"/> Never                                                                                                                                       | <input type="checkbox"/> Seldom         | <input type="checkbox"/> Sometimes | <input type="checkbox"/> Usually       | <input type="checkbox"/> Always          |
| <b>30.</b> | <b>If my parents or family prepare unhealthy snacks (e.g., chips, fruit roll-ups, corn snacks, etc.) for me to take to school, I accept them.</b>                    |                                         |                                    |                                        |                                          |
|            | <input type="checkbox"/> Never                                                                                                                                       | <input type="checkbox"/> Seldom         | <input type="checkbox"/> Sometimes | <input type="checkbox"/> Usually       | <input type="checkbox"/> Always          |
| <b>31.</b> | <b>If my family were overweight and eating a high fat diet, I would tell them to change their eating habits.</b>                                                     |                                         |                                    |                                        |                                          |
|            | <input type="checkbox"/> Never                                                                                                                                       | <input type="checkbox"/> Seldom         | <input type="checkbox"/> Sometimes | <input type="checkbox"/> Usually       | <input type="checkbox"/> Always          |
| <b>32.</b> | <b>When I go shopping with my mother or father, I buy healthy snacks such as nuts, raisins, and dried chickpeas instead of chips, snacks, chocolate, and sweets.</b> |                                         |                                    |                                        |                                          |
|            | <input type="checkbox"/> Never                                                                                                                                       | <input type="checkbox"/> Seldom         | <input type="checkbox"/> Sometimes | <input type="checkbox"/> Usually       | <input type="checkbox"/> Always          |
| <b>33.</b> | <b>When I go shopping with my mother or father, I buy foods that are certified as healthy.</b>                                                                       |                                         |                                    |                                        |                                          |
|            | <input type="checkbox"/> Never                                                                                                                                       | <input type="checkbox"/> Seldom         | <input type="checkbox"/> Sometimes | <input type="checkbox"/> Usually       | <input type="checkbox"/> Always          |
| <b>34.</b> | <b>When I go shopping with my mother or father, I buy foods with standardized labeling.</b>                                                                          |                                         |                                    |                                        |                                          |
|            | <input type="checkbox"/> Never                                                                                                                                       | <input type="checkbox"/> Seldom         | <input type="checkbox"/> Sometimes | <input type="checkbox"/> Usually       | <input type="checkbox"/> Always          |
| <b>35.</b> | <b>When I go shopping with my mother or father, I buy foods that are not expired.</b>                                                                                |                                         |                                    |                                        |                                          |
|            | <input type="checkbox"/> Never                                                                                                                                       | <input type="checkbox"/> Seldom         | <input type="checkbox"/> Sometimes | <input type="checkbox"/> Usually       | <input type="checkbox"/> Always          |
| <b>36.</b> | <b>When I go shopping with my mother or father, I buy foods with sustainable packaging.</b>                                                                          |                                         |                                    |                                        |                                          |
|            | <input type="checkbox"/> Never                                                                                                                                       | <input type="checkbox"/> Seldom         | <input type="checkbox"/> Sometimes | <input type="checkbox"/> Usually       | <input type="checkbox"/> Always          |
| <b>37.</b> | <b>When I go shopping with my mother or father, I buy foods that are stored appropriately or kept refrigerated.</b>                                                  |                                         |                                    |                                        |                                          |
|            | <input type="checkbox"/> Never                                                                                                                                       | <input type="checkbox"/> Seldom         | <input type="checkbox"/> Sometimes | <input type="checkbox"/> Usually       | <input type="checkbox"/> Always          |
| <b>38.</b> | <b>I eat food from all the food groups every day.</b>                                                                                                                |                                         |                                    |                                        |                                          |
|            | <input type="checkbox"/> Never                                                                                                                                       | <input type="checkbox"/> Seldom         | <input type="checkbox"/> Sometimes | <input type="checkbox"/> Usually       | <input type="checkbox"/> Always          |
| <b>39.</b> | <b>I usually try new foods that I've never eaten.</b>                                                                                                                |                                         |                                    |                                        |                                          |
|            | <input type="checkbox"/> Never                                                                                                                                       | <input type="checkbox"/> Seldom         | <input type="checkbox"/> Sometimes | <input type="checkbox"/> Usually       | <input type="checkbox"/> Always          |
| <b>40.</b> | <b>I usually try new vegetables that I've never eaten.</b>                                                                                                           |                                         |                                    |                                        |                                          |
|            | <input type="checkbox"/> Never                                                                                                                                       | <input type="checkbox"/> Seldom         | <input type="checkbox"/> Sometimes | <input type="checkbox"/> Usually       | <input type="checkbox"/> Always          |
| <b>41.</b> | <b>I can buy healthy food from the school cafeteria, depending on my pocket money.</b>                                                                               |                                         |                                    |                                        |                                          |
|            | <input type="checkbox"/> Never                                                                                                                                       | <input type="checkbox"/> Seldom         | <input type="checkbox"/> Sometimes | <input type="checkbox"/> Usually       | <input type="checkbox"/> Always          |
| <b>42.</b> | <b>If the school cafeteria doesn't offer any healthy foods, it will be difficult for me to choose healthy snack.</b>                                                 |                                         |                                    |                                        |                                          |
|            | <input type="checkbox"/> Definitely won't                                                                                                                            | <input type="checkbox"/> Probably won't | <input type="checkbox"/> Maybe     | <input type="checkbox"/> Probably will | <input type="checkbox"/> Definitely will |

43. Have you ever seen a fact sheet on a food package?

Yes

No

44. For the following pair of food fact sheets, choose the one you think is more nutritious (“better for you”) by filling in the circle next to your choice. Then explain the reasons for your choice.

| Nutrition Facts                             |           |                             |
|---------------------------------------------|-----------|-----------------------------|
| Servings Per Container: 4                   |           |                             |
| Serving size: 230gr                         |           |                             |
| Amount Per Serving                          |           |                             |
| Calories: 87.4 Kcal                         |           |                             |
| Nutrition Facts                             |           | %Nutrition Reference Values |
| Total Fat                                   | 2.78 gr   | **                          |
| Total Carbohydrate                          | 8.51 gr   | **                          |
| Sugar                                       | 0.27 gr   | **                          |
| Protein                                     | 7.13 gr   | 14.26%                      |
| Limit these nutrients                       |           |                             |
| Saturated Fatty Acid                        | 1.84 gr   | 9.2%                        |
| Trans Fatty Acid                            | 0 gr      | **                          |
| Sodium                                      | 242.65 mg | 12.13%                      |
| *Nutrition Reference Values not established |           |                             |

Figure A)

| Nutrition Facts                                |                 |                         |
|------------------------------------------------|-----------------|-------------------------|
| Calories in 100 gr = 52.92kcal                 |                 |                         |
| Calories from Fat in 100 gr = 28.8kcal         |                 |                         |
|                                                | Nutrition Facts | % Daily Value In 100 gr |
| Total Fat                                      | 3.2 gr          | 4.88                    |
| Saturated Fatty Acid                           | 2 gr            | 10                      |
| Trans Fatty Acid                               | 0 gr            | 0                       |
| Protein                                        | 3.15 gr         | 4.5                     |
| Total Carbohydrate                             | 2.88 gr         | 1                       |
| Sugar                                          | 0.36 gr         | 0.1                     |
| Sodium                                         | 42 mg           | 1.75                    |
| *Daily Values are based on a 2000 calorie diet |                 |                         |
| Total Fat lower than 65gr                      |                 |                         |
| Saturated Fatty Acid lower than 20gr           |                 |                         |
| Sodium lower than 2400mg                       |                 |                         |
| Carbohydrate lower than 300gr                  |                 |                         |

Figure B)

A)

B)

Don't know

- Why? (Explanation).....

45. According to the colored information about Tafi (a kind of chocolate), answer the following questions.

- 1) How would you describe the amount of sugar in this product?  
 a) low      b) moderate      c) high      d) don't know
- 2) How would you describe the total amount of fat and trans-fatty acid in this product?  
 a) low      b) moderate      c) high      d) don't know
- 3) How would you describe the amount of salt in this product?  
 a) low      b) moderate      c) high      d) don't know

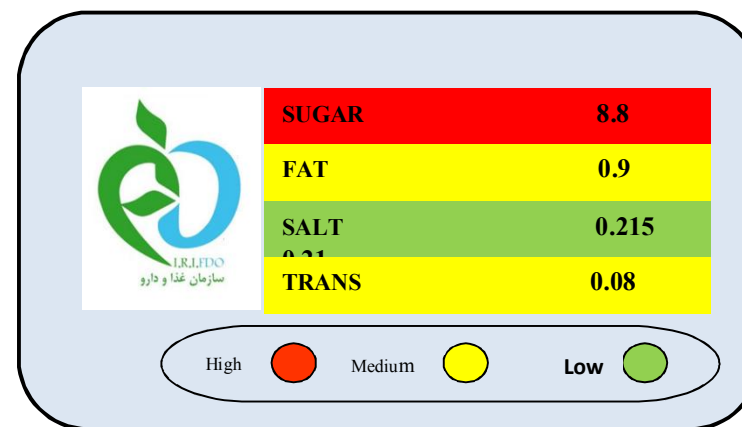

46. According to the colored information about pasteurized milk, answer the following questions.

- 1) How would you describe the amount of fat in this product?  
 a) low      b) moderate      c) high      d) don't know
- 2) How would you describe the amount of salt in this product?  
 a) low      b) moderate      c) high      d) don't know

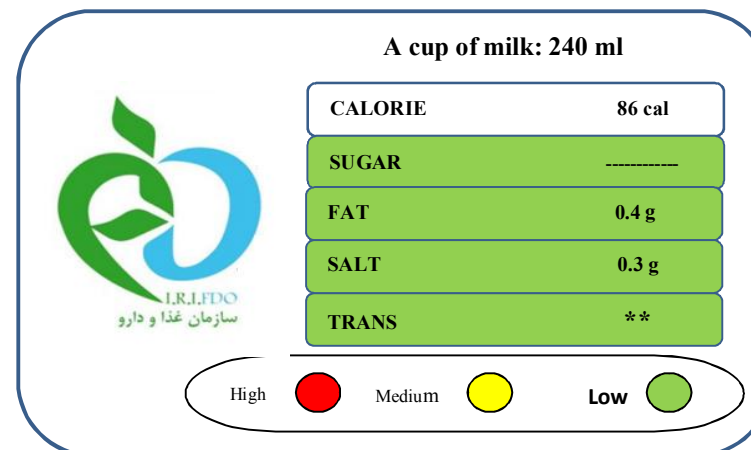

Supplement: pone.0179196.s005.pdf [file pone.0179196.s005.pdf]
